# Supplementary material
Source: PubMed Central journal article supplement (PMC2672558)
Supplement: 0901894106_0901894106SI.pdf [file 0901894106_0901894106SI.pdf]

# Supporting Information

Edin et al. 10.1073/pnas.0901894106

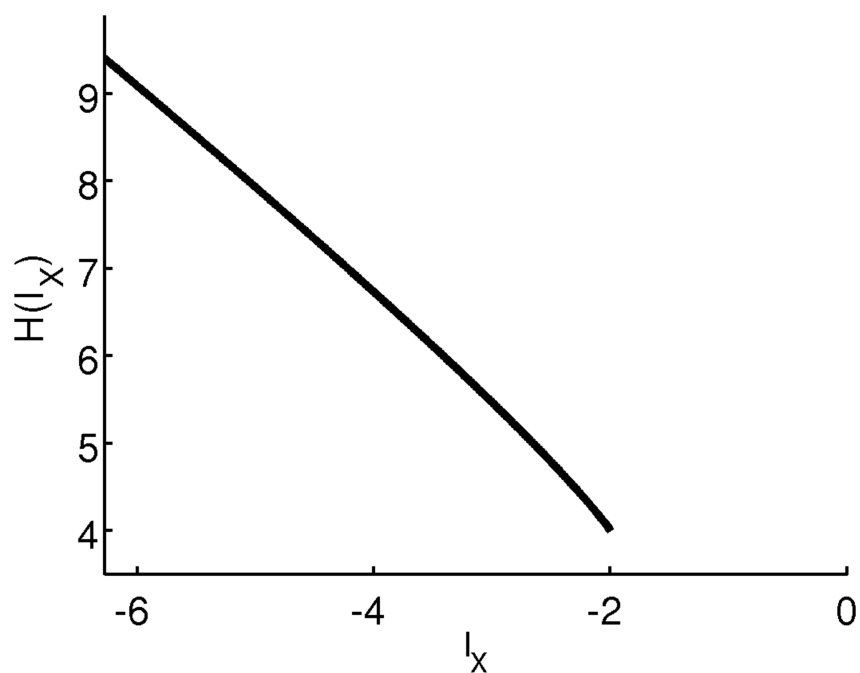

Fig. S1. Graphical representation of  $H(l_x)$  in the equation for  $p_{\text{cap}}$  (Eq. 2) with  $f(l) = (1 + e^{-l})^{-1}$

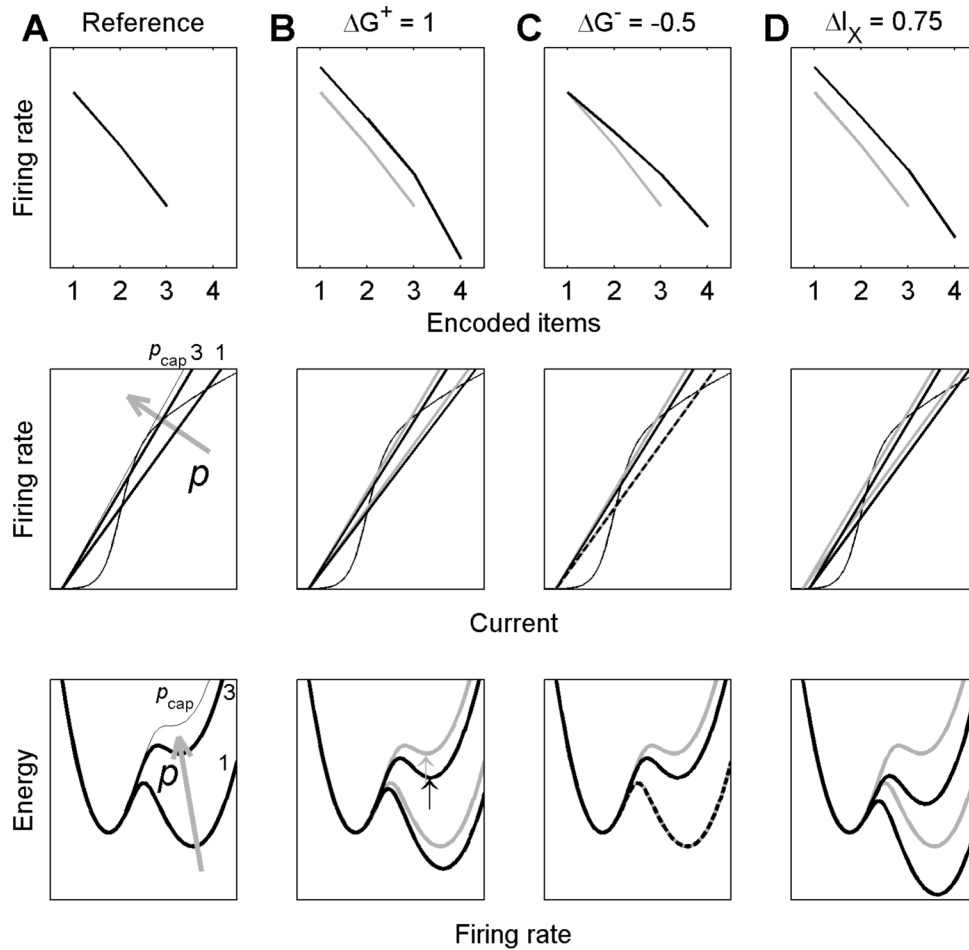

**Fig. S2.** Effect of changes in  $G^+$ ,  $G^-$ , or  $I_X$  on memory capacity and persistent activity. Changes in parameters that lead to improved capacity generally increase network activity. (*Top*) Firing rate of memories at different loads. (*Middle*) Graphical solutions of the capacity equation for two different loads,  $p = 1$  and 3. As  $p$  increases, the line representing the effective network synaptic strength shifts leftward. (*Bottom*) Potential energy landscape of the network at loads 1 and 3. Energy minima represent stable states. (A) Reference parameter set used in Fig. 2:  $A = 0.1$ ,  $G^+ = 22$ ,  $G^- = 2$ ,  $I_X = -6.25$ . When load equals capacity (thin line; here,  $p_{cap} = 3.57$ ) the synaptic line is tangential to the neuronal-input output curve in the *Middle*. (*Bottom*) The energy minimum corresponding to the memory state disappears at capacity (thin line). (B) Increasing capacity from 3 to 4 by increasing  $G^+$  leads to increased persistent activity at the same load (arrows indicate memory activity at load  $p = 3$ ). For comparison, the reference network is shown in gray. (C) Same for  $G^-$ . (D) Same for  $I_X$ . Generally, networks that have higher capacity caused by a change in a  $G^+$ ,  $G^-$ , or  $I_X$  also have higher activity at the same load.

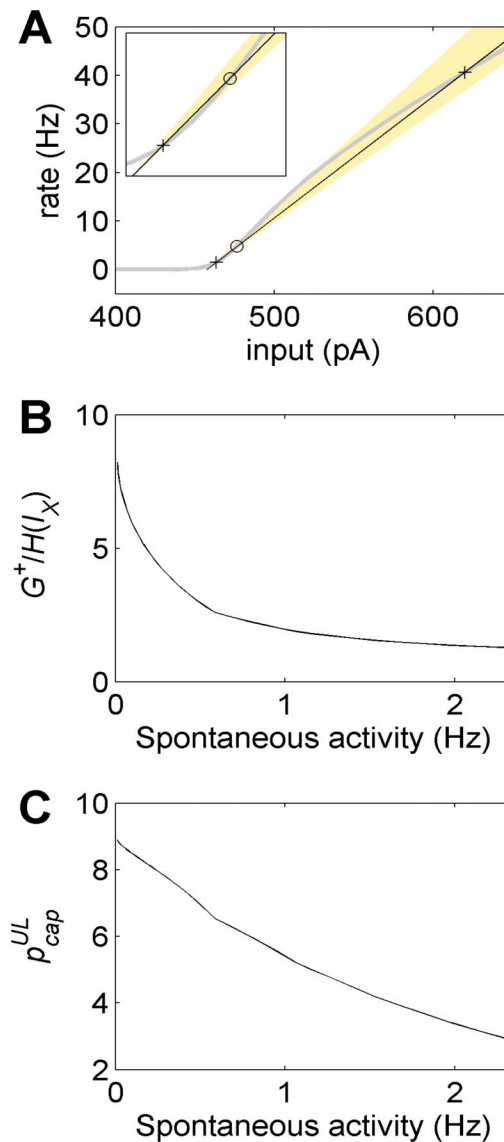

**Fig. S3.** Working memory capacity in a balanced network. (A) The network is stable when the line and the curve intersect in three places. For the value of  $I_X$  in the figure, the golden area represents the region of stable memory activity. The size of this area is determined by the ratio between  $G^+$  and  $H(I_X)$ , which determines the right and left border of the area. (B)  $G^+/H(I_X)$  is in turn determined by the spontaneous activity. For spontaneous rates above  $\approx 1.5$ ,  $G^+/H(I_X) < 1.5$ . (C) Having determined  $G^+/H(I_X)$ , Eqs. 3 and S6 (see *SI Appendix*) can now be used to calculate  $p_{cap}^{UL}$  for a given level of spontaneous activity. Note that although  $p_{cap}^{UL}$  in Eqs. 3 and S6 (see *SI Appendix*) is a continuous variable, only a discrete number of stimuli can be presented, making capacity an integer number. The following parameters were used. Standard deviation of input current, determining the linearity of the  $f-I$  curve:  $\sigma = 0.001$ .  $w: 0.1$ .

**Table S1. Maxima in the conjunction analysis of fMRI activation in either M3–C3 or M5–C5 contrasts; group analysis**

| Location                      |   | Area* | BA <sup>†</sup> | MNI coordinates | t statistic | Cluster size        |
|-------------------------------|---|-------|-----------------|-----------------|-------------|---------------------|
| Superior parietal lobule      | R |       | 7               | 16, -74, 52     | 6.69        | 12,494 <sup>I</sup> |
|                               | L |       | 7               | -14, -70, 52    | 4.93        | 12,494 <sup>I</sup> |
| Middle occipital gyrus        | L |       | 17/18           | -34, -88, 14    | 5.08        | 12,494 <sup>I</sup> |
|                               | R | e     | 17/18           | 36, -90, 14     | 5.12        | 12,494 <sup>I</sup> |
| Superior frontal gyrus (SFG)/ | R | b     | 6               | 30, -4, 56      | 4.02        | 1,852 <sup>II</sup> |
| Middle frontal gyrus          | L |       | 6               | -24, -2, 58     | 3.24        | 372                 |
| Medial frontal gyrus (mSFG)   | R | d     | 8/32            | 8, 18, 50       | 2.16        | 1,852 <sup>II</sup> |
| Inferior frontal gyrus (IFG)  | R | c     | 47              | 34, 20, 6       | 3.41        | 443                 |
|                               | L |       | 47              | -30, 22, -4     | 2.92        | 199                 |
| Middle frontal gyrus (dlPFC)  | R | a     | 9/46            | 52, 34, 32      | 2.94        | 791 <sup>III</sup>  |
|                               | R | a     | 46              | 42, 44, 22      | 3.56        | 791 <sup>III</sup>  |
|                               | R | a     | 10/46           | 38, 54, 26      | 2.12        | 791 <sup>III</sup>  |
|                               | L |       | 46              | -46, 48, 14     | 3.01        | 144 <sup>IV</sup>   |
|                               | L |       | 10/46           | -32, 62, 8      | 1.94        | 144 <sup>IV</sup>   |

Clusters identified testing the global null hypothesis of no activation in either M5–C5 or M3–C3 contrasts, with a threshold at  $P = 0.05$  after correcting for multiple comparisons using the false-discovery rate procedure. Only clusters larger than 100 voxels are shown.

\*Identification of areas tagged with lower-case letters in the brain illustration of Fig. 4B.

<sup>†</sup>Brodmann area (BA) estimation from Talairach Daemon Client v2.0 (<http://ric.uthscsa.edu/resources>) and xjView (<http://people.hnl.bcm.tmc.edu/cuixu/xjView/>). I, II, III, and IV indicate same activation cluster.

**Table S2. Cell parameters**

| Parameter    | E cells  | I cells  |
|--------------|----------|----------|
| $N$          | 1,024    | 256      |
| $C_m$        | 0.5 nF   | 0.2 nF   |
| $g_L$        | 25 nS    | 20 nS    |
| $E_L$        | -70 mV   | -70 mV   |
| $V_{res}$    | -60 mV   | -60 mV   |
| $V_{th}$     | -50 mV   | -50 mV   |
| $\tau_{ref}$ | 2 ms     | 1 ms     |
| $r_x$        | 1,800 Hz | 1,800 Hz |

$N$ , number of cells;  $C_m$ , membrane capacitance;  $g_L$ , leak conductance;  $E_L$ , leak reversal potential;  $V_{res}$ , reset potential;  $V_{th}$ , spike threshold potential;  $\tau_{ref}$ , refractory period time constant;  $r_x$ , rate of external afferents. For an explanation of these parameters and the equations they govern, see Compte A, Brunel N, Goldman-Rakic PS, Wang XJ (2000) Synaptic mechanisms and network dynamics underlying spatial working memory in a cortical network model. *Cereb Cortex* 10:910–923.

**Table S3. Synaptic parameters**

| Parameter        | AMPA | NMDA                  | GABA   |
|------------------|------|-----------------------|--------|
| $\tau_s$         | 2 ms | 100 ms                | 10 ms  |
| $\alpha_s$       |      | $0.5 \text{ ms}^{-1}$ |        |
| $\tau_x$         |      | 2 ms                  |        |
| $V_{\text{rev}}$ | 0 mV | 0 mV                  | -70 mV |

$\tau_s$ , decay time constant for  $s$ , the fraction of open channels;  $\alpha_s$ , saturation constant;  $\tau_x$ , rise time constant;  $V_{\text{rev}}$ , reversal potential. For an explanation of these parameters and the equations they govern, see Compte A, Brunel N, Goldman-Rakic PS, Wang XJ (2000) Synaptic mechanisms and network dynamics underlying spatial working memory in a cortical network model. *Cereb Cortex* 10:910–923.

**Table S4. Connectivity**

| Parameter                                 | IPS       | dIPFC  |
|-------------------------------------------|-----------|--------|
| Connection strength $G$ , nS              |           |        |
| E→E, AMPA                                 | 0.0       | 0.0    |
| E→E, NMDA                                 | 0.684     | 0.968  |
| E→I, AMPA                                 | 0.0       | 0.0    |
| E→I, NMDA                                 | 0.479     | 0.723  |
| I→E*                                      | 3.643     | 3.660  |
| I→I                                       | 2.896     | 2.832  |
| X→E†                                      | →Table S5 | 3.000  |
| X→I                                       | 5.800     | 2.3803 |
| Connection curve width $\sigma$ , degrees |           |        |
| E→E                                       | 9.4       |        |
| E→I                                       | 32.4      |        |
| I→E                                       | 32.4      |        |
| Connection curve height $J^+$ , unitless  |           |        |
| E→E                                       | 5.7       |        |
| E→I                                       | 1.4       |        |
| I→E                                       | 1.4       |        |

For an explanation of the parameters and the equations they govern, see Compte A, Brunel N, Goldman-Rakic PS, Wang XJ (2000) Synaptic mechanisms and network dynamics underlying spatial working memory in a cortical network model. *Cereb Cortex* 10:910–923.

\*Connections from I cells are always GABA<sub>A</sub>R-mediated.

†X, external afferents.

**Table S5. Parameters varied in simulations**

| Figure    | $G_{X \rightarrow E}$ , nS | dIPFC $\rightarrow$ IPS, nS | dIPFC rate, Hz |
|-----------|----------------------------|-----------------------------|----------------|
| 1B        | 6.6                        |                             |                |
| 1 C and D | 6.4, 6.45, 6.5             |                             |                |
| 1E        | 6.55–6.725                 |                             |                |
| 3 B and C | 6.525                      | 9                           |                |
| 3D        | 6.525                      | 0–15                        |                |
| 3E        | 6.525                      | 6.525                       | 0–95           |
| 3F        | 6.625–6.775                |                             |                |

For an explanation of these parameters and the equations they govern, see Compte A, Brunel N, Goldman-Rakic PS, Wang XJ (2000) Synaptic mechanisms and network dynamics underlying spatial working memory in a cortical network model. *Cereb Cortex* 10:910–923.

## Other Supporting Information Files

[SI Appendix](#)
